# Supplementary material for: A Cutoff Determination of Real-Time Loop-Mediated Isothermal Amplification (LAMP) for End-Point Detection of Campylobacter jejuni in Chicken Meat
Source: MDPI journal article supplement (doi:10.3390/vetsci9030122), 2022-03-08
Supplement: s1 [file s1]

### Supplementary Materials

```

proc logistic data=roc1;
  model positive(event='1')=cycle/outroc=rocdata;
  roc; roccontrast;
run;

data roc2; set rocdata;
  logit=log(_prob_/(1-_prob_));
  Cutoff=(logit-2.3689)/-0.0682;
  Sensitivity=_sensit_;
  Specificity=1-_1mspec_;
  YJ=Sensitivity+Specificity-1;
run;

proc sort data=roc2;
  by descending YJ;
run;

proc print data=roc2 (obs=25) noobs;
  var Cutoff Sensitivity Specificity YJ;
run;

```

**Figure S1.** SAS code for the ROC curve analysis

**Table S1.** A 2 × 2 table for calculation of sensitivity, specificity, and predictive values of the LAMP assay

|               | Culture positive | Culture negative | Total |
|---------------|------------------|------------------|-------|
| LAMP positive | 31               | 2                | 33    |
| LAMP negative | 1                | 46               | 47    |
| Total         | 32               | 48               | 80    |
